# Supplementary material for: Glucose uptake in Azotobacter vinelandii occurs through a GluP transporter that is under the control of the CbrA/CbrB and Hfq-Crc systems
Source: PubMed Central journal article supplement (PMC5429807; doi:10.1038/s41598-017-00980-5), 2017-04-12
Supplement: 41598_2017_980_MOESM1_ESM.pdf [file 41598_2017_980_MOESM1_ESM.pdf]

## Supplementary Information

### **Glucose uptake in *Azotobacter vinelandii* occurs through a GluP transporter that is under the control of the CbrA/CbrB and Hfq-Crc systems**

Elva Quiroz-Rocha<sup>1</sup>, Renata Moreno<sup>2</sup>, Armando Hernández-Ortíz<sup>1</sup>, Juan Carlos Fragoso-Jiménez<sup>3</sup>, Luis Felipe Muriel-Millán<sup>1</sup>, Josefina Guzmán<sup>1</sup>, Guadalupe Espín<sup>1</sup>, Fernando Rojo<sup>2</sup> and Cinthia Núñez<sup>1\*</sup>

<sup>1</sup> Departamento de Microbiología Molecular, Instituto de Biotecnología, Universidad Nacional Autónoma de México. Cuernavaca, Morelos, México

<sup>2</sup> Departamento de Biotecnología Microbiana, Centro Nacional de Biotecnología, CSIC, Darwin 3, Cantoblanco, 28049 Madrid, Spain

<sup>3</sup> Departamento de Ingeniería Celular y Biocatálisis, Instituto de Biotecnología, Universidad Nacional Autónoma de México. Cuernavaca, Morelos, México

\* [cinthia@ibt.unam.mx](mailto:cinthia@ibt.unam.mx); Tel. (+52) 777 3290873; Fax (+52) 777 3172388.

## Supplementary Methods

**Nucleic acid procedures.** The *A. vinelandii* genome sequence<sup>1</sup> was used for designing the primers used for PCR amplifications. The high fidelity Phusion DNA polymerase (Thermo Scientific) was used for all PCR amplifications using chromosomal DNA from strain AEIV as template.

### Plasmids construction.

**pJGD.** Plasmid pMSD27, which carries the *algD* gene<sup>2</sup> was partially digested with *ScaI* enzyme disrupting *algD* in the codon 256; ends were refilled with Klenow enzyme and a Km<sup>r</sup> cassette, excised with *EcoRV* endonuclease from plasmid pBSL99<sup>3</sup>, was ligated producing plasmid pJGD (*algD*::Km).

**pJGEY2.** *cbrA* ORF was PCR amplified using oligonucleotides F-1(*cbrA*) and R-1(*cbrA*) and was cloned into pMOS *blue* vector (GE Healthcare) producing plasmid pCN48. An Sp<sup>r</sup> cassette derived from plasmid pHP45Ω<sup>4</sup> was inserted into the unique *StuI* site disrupting the *cbrA* gene. The resulting plasmid, named pJGEY2 (*cbrA*::Sp).

**pAH03.** A fragment of 1.9 kb was PCR amplified using primers *gluP*-F and *gluP*-R and cloned into plasmid pCR2.1-TOPO (Invitrogen) generating plasmid pAH01. The *EcoRI* *gluP* fragment of 1.945 kb, derived from plasmid pAH01, was subcloned into vector pBluescript *KS*<sup>+</sup> (Stratagene) producing plasmid pAH02. pAH02 was excised with *StyI* releasing a *gluP* internal fragment of 600 pb. The *StyI* cohesive ends were made blunt with the Klenow enzyme and a *SmaI* fragment carrying a Sp<sup>r</sup> cassette released from plasmid pHP45Ω<sup>4</sup> was then ligated, generating plasmid pAH03 (*gluP*::Sp).

**pEY05.** *scrX* was previously shown to be dispensable for vegetative growth<sup>5</sup>. A region of 3.5 kb containing the gene *scrX* was PCR amplified using primers *scrX*-F and *scrX*-R. The resulting product was sub-cloned into vector pCR2.1-TOPO (Invitrogen) generating plasmid pEY01. An inverse PCR was conducted to delete the regulatory and the structural region of *scrX*, by using primers *scrX*InvF and *scrX*Inv-R. The resultant product was digested with enzyme *StuI* and ligated to a 5 kb fragment containing the *crcZ* promoter, followed by the *gusA* gene and a Tc<sup>r</sup> cassette, generating plasmid pEY05 (*P<sub>crcZ</sub>-gusA*). The 5 kb fragment was obtained by PCR amplification using primers pJGgusF and pJGgus-

R and plasmid pEY02 as DNA template. Plasmid pEY02 is a pCN154 derivative (Tc<sup>r</sup>), used for the construction of chromosomal transcriptional fusions with *gusA* in *A. vinelandii* strain UW16<sup>6</sup>, and carries an XbaI-EcoRI fragment of 500 bp comprising the regulatory region of *crcZ*, amplified by PCR using primers pcrcZFXb and pcrcZRRI.

**pGJ112.** A fragment of 246 bp, carrying the *crcY* regulatory region, was amplified by PCR using primers *crcY*-Xb-F and *crcY*-Pst-R, which include restriction sites for XbaI and PstI endonucleases, respectively. This fragment was subcloned into vector pUMATc<sub>gus</sub>AT<sup>7</sup> previously cut with XbaI and PstI enzymes generating plasmid pGJ112 (*PcrcY-gusA*).

**Expression and purification of *A. vinelandii* Crc protein:** The Crc protein was purified with no His-tag using the Impact-CN intein system (New England Biolabs), as described<sup>8</sup>. To construct a plasmid specifying the Crc-intein fusion, the *crc* gene was PCR amplified using AEIV chromosomal DNA as template and primers *crc*-NdeFw and *crc*-XhoRv, containing a restriction site for NdeI and XhoI enzymes, respectively. The resulting fragment was cloned between the NdeI-XhoI sites of the P<sub>T7</sub> expression vector pTYB1 (New England Biolabs), generating plasmid pEQEcrc. The amplified DNA segment was sequenced to assure the absence of undesired mutations. Plasmid pEQEcrc was transformed into the *E. coli* EC6779, an Hfq-null derivative of the *E. coli* T7 expression strain BL21(DE3)<sup>9</sup>, and overproduction of the Crc-intein fusion was induced by addition of 0.5 mM IPTG to cells grown to mid-log phase (A<sub>600</sub> of 0.6). After 4 h at 37°C, cells were collected and disrupted by sonication in 20 mM Tris-HCl, pH 8, 500 mM NaCl, 0.1% Triton X-100, 50 µM PMSF. After eliminating cell debris by centrifugation for 30 min at 20 000 × *g* at 4°C, the supernatant was loaded onto a chitin column. The column was extensively washed with wash buffer (250 mM NaCl, 50 mM Tris-HCl, pH 7.5). The Crc-intein fusion was cleaved by an overnight treatment with wash buffer containing 100 mM DTT. The Crc protein was eluted from the column, dialysed against 200 mM NaCl, 20 mM Tris-HCl, pH 8. Protein concentration was determined from BCA (Pierce), and stored at -70°C in 20 mM Tris-HCl, pH 8.0; 200 mM NaCl, 1 mM EDTA; 20% glycerol.

**Expression and purification of *A. vinelandii* Hfq-His.** The *A. vinelandii* *hfq* gene carrying in frame fusions to six consecutive histidine codons prior to the termination codon, was synthesized as a 267 bp NdeI-XhoI fragment using primers exp<sub>hfq</sub>Fw and exp<sub>hfq</sub>R.

This fragment, having a NdeI site overlapping the ATG initiation codon and a XhoI downstream of the termination codon, was sub-cloned between these sites of the T7 expression vector pET22b (Novagen) to generate pET22::Hfq. Purification of *A. vinelandii* Hfq protein was performed using expression plasmid pET22::Hfq. This plasmid was introduced into EC6779 strain. Hfq-His protein was purified from crude cell lysates of a culture grown to OD<sub>600</sub> of 0.6 prior to overnight induction with 1 mM IPTG by Ni<sup>2+</sup>-affinity chromatography using a buffer containing 20 mM Tris-HCl, pH 8.0; 300 mM NaCl, 5 mM imidazole and a protease inhibitor cocktail. The Hfq-His protein was recovered by stepwise elution with the same buffer containing 20 to 250 mM imidazole followed by extensive dialysis of a pool of the most concentrated fractions to remove imidazole. Final preparations were stored at -20°C in storage buffer [20 mM Tris-HCl, pH 8.0; 300 mM NaCl, 1 mM ethylenediaminetetraacetic acid (EDTA); 40% glycerol].

**Quantitative real time reverse transcription (qRT-PCR).** The cells were collected by centrifugation, and the total RNA was extracted as described<sup>10</sup>. Genomic DNA contamination in the total RNA samples was removed with DNase I (Thermo Scientific). The RNA concentration was measured by 260/280 nm ratio absorbance. RNA integrity was analyzed by agarose gel electrophoresis. The absence of DNA was verified by RT-PCR using primers for *rpoS*. cDNA was synthesized using the Revert Aid TM H First Strand cDNA Synthesis kit (Thermo Fisher Scientific) and a mixture of the specific DNA primers. The primers were designed using the Primer3 program (<http://bioinfo.ut.ee/primer3/>) with an optimal length of 20 bases, and a melting temperature of 60°C. The cDNA generated was used as template for qRT-PCR assays performed with a Light Cycler 480 II instrument (Roche), using the Maxima TM SYBR Green/ROX qPCR Master Mix (2X) kit (Thermo Scientific). Each primer set was validated by verifying specific single product amplification by melting-curve analyses. Then, the efficiency of PCR was assessed by developing standard curves for each amplicon using dilution series of the cDNA corresponding to the reference sample. cDNAs derived from the experimental and reference samples were amplified using quantities within the linear range of the standard curve. Amplification conditions were 10 min at 95° C, and a two-step cycle at 95° C for 15 s and 60° C for 60 s for a total of 40 cycles. The size of all amplicons was from 95 -110 bp. Three biological

replicates (independent cell cultures) were performed with three technical replicates for each one generating similar results.

## Supplementary Tables

**Table S1.** *A. vinelandii* genes involved in glucose transport and catabolism containing putative A-rich Hfq-binding motifs.

| Sequence    | Position<br>(rel. to AUG) | Gene         | ID number  | Description                                                         |
|-------------|---------------------------|--------------|------------|---------------------------------------------------------------------|
| ACAACAAGA   | -7 to -17                 | <i>gluP</i>  | Avin_04150 | glucose/galactose transporter protein                               |
| AAAGAAAAA   | -5 to -13                 | <i>zwf-3</i> | Avin_16620 | glucose-6-phosphate 1-dehydrogenase                                 |
| AAAAAGAACAA | -6 to -16                 | <i>zwf-2</i> | Avin_17630 | glucose-6-phosphate 1-dehydrogenase                                 |
| AACAACAAA   | -18 to -26                | <i>eda-1</i> | Avin_27250 | keto-hydroxyglutarate-aldolase/keto-deoxy-phosphogluconate aldolase |
| AAAAACAACAA | -16 to -26                | <i>kguT</i>  | Avin_26900 | 2-ketogluconate transporter                                         |
| AAGAACA     | +3 to +9                  | <i>kguD</i>  | Avin_26910 | 2-ketogluconate 6-phosphate reductase                               |
| AACAACAA    | +1 to -8                  | <i>eno</i>   | Avin_38790 | phosphopyruvate hydratase (enolase)                                 |

**Table S2.** Bacterial strains used in this study

| Name                                | Genotype/Relevant characteristics                                                                                 | Reference |
|-------------------------------------|-------------------------------------------------------------------------------------------------------------------|-----------|
| <b><i>A. vinelandii</i> strains</b> |                                                                                                                   |           |
| AEIV (also name E strain)           | Wild type strain                                                                                                  | 11        |
| EQR02                               | AEIV derivative carrying a <i>cbrA</i> ::Sp mutation. Sp <sup>r</sup>                                             | This work |
| AEalgD                              | AEIV derivative carrying an <i>algD</i> ::Km. Unable to produce alginate. Km <sup>r</sup>                         | This work |
| GG15                                | AEIV derivative carrying a <i>cbrA</i> ::miniTn5 mutation. Highly mucoid. Sp <sup>r</sup>                         | This work |
| AE-Zgus                             | AEIV derivative carries a chromosomal <i>crcZ-gusA</i> transcriptional fusion. Tc <sup>r</sup>                    | This work |
| CbrA-Zgus                           | EQR02 derivative carries a chromosomal <i>crcZ-gusA</i> transcriptional fusion. Sp <sup>r</sup> , Tc <sup>r</sup> | This work |
| AE-Ygus                             | AEIV derivative carries a chromosomal <i>crcY-gusA</i> transcriptional fusion. Tc <sup>r</sup>                    | This work |
| CbrA-Ygus                           | EQR02 derivative carries a chromosomal <i>crcY-gusA</i> transcriptional fusion. Sp <sup>r</sup> , Tc <sup>r</sup> | This work |
| AH1                                 | GG15 derivative carries an <i>algD</i> ::Km mutation. Sp <sup>r</sup> , Km <sup>r</sup>                           | This work |
| AHI30                               | AEIV derivative carries a <i>gluP</i> ::Sp mutation. Sp <sup>r</sup>                                              | This work |
| <b><i>P. putida</i> strains</b>     |                                                                                                                   |           |
| KT2440                              | Wild type strain                                                                                                  | 12        |
| KTCRC                               | KT2440 <i>crc</i> null mutant; Tc <sup>r</sup>                                                                    | 13        |
| <b><i>E. coli</i> strains:</b>      |                                                                                                                   |           |
| DH5a                                | <i>supE44 DlacU169 hsdR17 recA1 endA1 gyrA96 thi-1 relA1</i>                                                      | 14        |
| WHIP                                | $\Delta$ <i>ptsHlcr</i> , <i>galP</i> ::FRT                                                                       | 15        |
| WHIPC                               | $\Delta$ <i>ptsHlcr</i> , $\Delta$ <i>mglABC</i> ::FRT-Cm-FRT, <i>galP</i> ::FRT                                  | This work |
| EC6779                              | Hfq null derivative of BL21 (DE3), Cm <sup>r</sup>                                                                | 9         |

Abbreviations: Cm, chloramphenicol; Tc, tetracycline; Sp, spectinomycin; Km, kanamycin.

**Table S3.** Plasmids used in this study

| Plasmids         | Relevant characteristics                                                                                                            | Reference                |
|------------------|-------------------------------------------------------------------------------------------------------------------------------------|--------------------------|
| pJET1.2          | Cloning vector; Ap <sup>r</sup>                                                                                                     | Thermo Fisher Scientific |
| pCR2.1-TOPO      | Clonning vector; Ap <sup>r</sup> Km <sup>r</sup>                                                                                    | Invitrogen               |
| pBluescript KS+  | Used for subcloning of DNA; Ap <sup>r</sup>                                                                                         | Stratagene               |
| pMOS <i>Blue</i> | Clonning vector; Ap <sup>r</sup>                                                                                                    | GE Healthcare            |
| pMSD27           | Plasmid containing 5.5 kb of <i>A. vinelandii</i> DNA including <i>algD</i> . Tc <sup>r</sup> , Ap <sup>r</sup> , Cm <sup>r</sup> . | 2                        |
| pUMATcgusAT      | Vector with the <i>gusA</i> gene for transcriptional fusions; Ap <sup>r</sup> , Tc <sup>r</sup>                                     | 7                        |
| pCN154           | Vector with the <i>gusA</i> gene for transcriptional fusions; Ap <sup>r</sup> , Tc <sup>r</sup>                                     | 6                        |
| pHP45Ω           | Source of the Sp <sup>r</sup> cassette                                                                                              | 4                        |
| pUJ9             | <i>lacZ</i> promoterless vector, for translational fusions, Ap <sup>r</sup>                                                         | 16                       |
| pTZ19r           | T7 promoter expression vector, Ap <sup>r</sup>                                                                                      | Thermo Fisher Scientific |
| pSEVA424         | IPTG inducible <i>Ptrc</i> expression plasmid; Sm <sup>r</sup>                                                                      | 17                       |
| pET22b           | T7 expression vector, C-terminal histidine tag; Ap <sup>r</sup>                                                                     | NOVAGEN                  |
| pTYB1            | T7 expression vector for in-frame fusion with an intein tag; Ap <sup>r</sup>                                                        | New England Biolabs      |
| pKD3             | FRT-Cm-FRT, Ap <sup>r</sup>                                                                                                         | 18                       |
| pSRKKm           | Replicative vector in <i>A. vinelandii</i> contains an IPTG inducible promoter. Km <sup>r</sup>                                     | 19                       |
| pCN48            | pMOS <i>Blue</i> vector derivative carries a 2.8 kb fragment containing the <i>cbrA</i> gene                                        | This work                |
| pJGD             | pMSD27 derivative carries an <i>algD::Km</i> mutation                                                                               | This work                |
| pJGEY2           | pCN48 derivative carries a <i>cbrA::Sp</i> mutation                                                                                 | This work                |
| pGG15            | pBuescript KS+ derivative carrying a PstI fragment containing the <i>cbrA::miniTn5</i> insertion from strain GG15                   | This work                |
| pEY01            | pCR2.1-TOPO derivative, carries a 3.5 kb fragment of <i>scrX</i> gene                                                               | This work                |
| pEY02            | pCN154 derivative, carries a <i>PcrcZ-gusA</i> transcriptional fusion.                                                              | This work                |
| pEY03            | pCR2.1-TOPO derivative, carries the <i>crcZ locus</i> of 1.8 kb                                                                     | This work                |
| pEY05            | pEY01 derivative, carries a <i>PcrcZ-gusA</i> transcriptional fusion                                                                | This work                |
| pGJ112           | pUMATcgusAT derivative, carries a 0.246 kb fragment of the <i>crcY</i> regulatory region                                            | This work                |
| pAH01            | pCR2.1-TOPO derivative, carries a 1.9 kb fragment of gene <i>gluP</i>                                                               | This work                |
| pAH02            | pBluescript KS+ derivative, carries an EcoRI <i>gluP</i> fragment of 1.945 kb, from plasmid pAH01                                   | This work                |
| pAH03            | pAH02 derivarive carrying an insertion of a Sp <sup>r</sup> cassette within the <i>gluP</i> gene                                    | This work                |



|            |                                                                                                                       |           |
|------------|-----------------------------------------------------------------------------------------------------------------------|-----------|
| pSRK-crc   | pSRKKm derivative carries a copy of the <i>crc</i> gene                                                               | This work |
| pSRK-gluP  | pSRKKm derivative carries a copy of the <i>gluP</i> gene                                                              | This work |
| pUJEQP     | pUJ9 derivative; carries a 0.67 kb fragment of the <i>A. vinelandii gluP</i> promoter                                 | This work |
| pEQ424P    | pSEVA424 derivative; carries a <i>gluP-lacZ</i> translational fusion under the control of the IPTG inducible promoter | This work |
| pET22::Hfq | pET22b derivative; carries the <i>A. vinelandii hfq</i> gene                                                          | This work |
| pEQEcrc    | pTYB1 derivative; carries the <i>A. vinelandii crc</i> gene                                                           | This work |
| pEQZIT     | pTZ19r derivative; carries the <i>A. vinelandii crcZ</i> gene                                                         | This work |

Abbreviations: Cm, chloramphenicol; Tc, tetracyclin; Sm, streptomycin; Ap, ampicillin; Sp, spectinomycin; Km, kanamycin.

**Table S4.** Sequences of the primers used in this study.

| Primer Name     | Nucleotide sequence (5'–3')                                                                      |
|-----------------|--------------------------------------------------------------------------------------------------|
| UcrcZ-F2        | CAG TTC CGT GAG GAC CTG                                                                          |
| DcrcZ-R         | CAG TTC CGT GAG GAC CTG                                                                          |
| scrX-F          | GAG CTC CGA TGA CGA TCG CTG GCA AC                                                               |
| scrX-R          | GAG CTC GCG TTC TCA GAT GGC TGG TC                                                               |
| scrXInvF        | AGGCCTCTATGTAGGTCCTCGCTTG                                                                        |
| scrXInv-R       | AGGCCTTAGGGCAACCGTGCCAGAC                                                                        |
| pJGgusF         | GACCAGTACGTTTCGGTTCTG                                                                            |
| pJGgus-R        | CCCTTGAAAGACTCCAGGAAG                                                                            |
| percZFXb        | TCTAGAGACCTGGAGGACGATGATTTTC                                                                     |
| percZRRI        | GAATTCATTGTGGGTGGTACGTCTTG                                                                       |
| gluP-F          | CAT GTG GAT CGA CTC AGG AG                                                                       |
| gluP-R          | CCA GGC ATT CGG TAT AGA AG                                                                       |
| SPerc-F         | AGGCCTCTATGTAGGTCCTCGCTTG                                                                        |
| crc-R           | GAGCTCGCATCCTGATGATGCTCTGC                                                                       |
| crcY-Pst-R      | CTGCAGTTGTTGTTCTTGAGATACCG                                                                       |
| crcY-Xb-F       | TCTAGACGGTAACAAACGGACGTTAC                                                                       |
| mglABCDtF       | AGC ATT TAT CTC AAG CAC TAC CCT GCA TAA GAA AAA CCG GAG<br>ATA CCA TGG TGT AGG CTG GAG CTG CTT C |
| mglABCDtR       | TTT ATG ACC GAA TGC GGA CCA CAT TCA CAT CAT TTC TTA CGC<br>GCG TAT TTA TGG GAA TTA GCC ATG GTC C |
| mglABF          | GCT TCG GCG TTC AGT AAC AC                                                                       |
| mglABR          | TAT GAC CGA ATG CGG ACC AC                                                                       |
| exphfqFw        | ATC CAT ATG TCA AAA GGG CAT TCG                                                                  |
| exphfqRv        | ATC CTC GAG GGC GTT GCC GGG TTC GGG                                                              |
| crc-Nde Fw      | TTT TGG GGG CCA CAT ATG CGG                                                                      |
| crc-Xho Rv      | ATC CTC GAG CAG GCT CAG CAG CCA GTC G                                                            |
| crcZHd-Fw       | GGA AAG CTT CGT ACA ACA ACA ATA ACA                                                              |
| crcZEco-ROK     | ACCGAATTCGAACGCAGAAAGGGAGCC                                                                      |
| gluP F EcoRI    | TTT TTG AAT TCT GAA ACG ATT CAT CAA TA                                                           |
| gluP R Bam      | TTTTTGGATCCTCTACCGTCGTCATCGTG                                                                    |
| LgluP-FwEcoRI   | TTATTGAATTCGGCCTCTCCTTGAAGCAA                                                                    |
| LacZ-RevHindIII | TTATTAAGCTTTTATTTTTGACACCAGACCA                                                                  |
| F-1(cbrA)       | GCA CCT ACC AAC TGT CGT CC                                                                       |
| R-1(cbrA)       | GCT GAT GAT CAG GTC GAA GC                                                                       |
| algDF           | CGATCAAGGACTACAACCTTC                                                                            |
| algDR           | TTGCTGTCTGA AGATGCTCAG                                                                           |
| 16S Fw          | ACCGCATCCAAAACACTACTGG                                                                           |
| 16S Rv          | GCCACTGGTGTTCCTTCTTA                                                                             |
| gluP qPCR Fw    | GCGATTGAGCCTGTACGT TT                                                                            |
| gluP qPCR Rv    | CTGAGGCTGAACAGGTCCTT                                                                             |

## Supplementary Figures

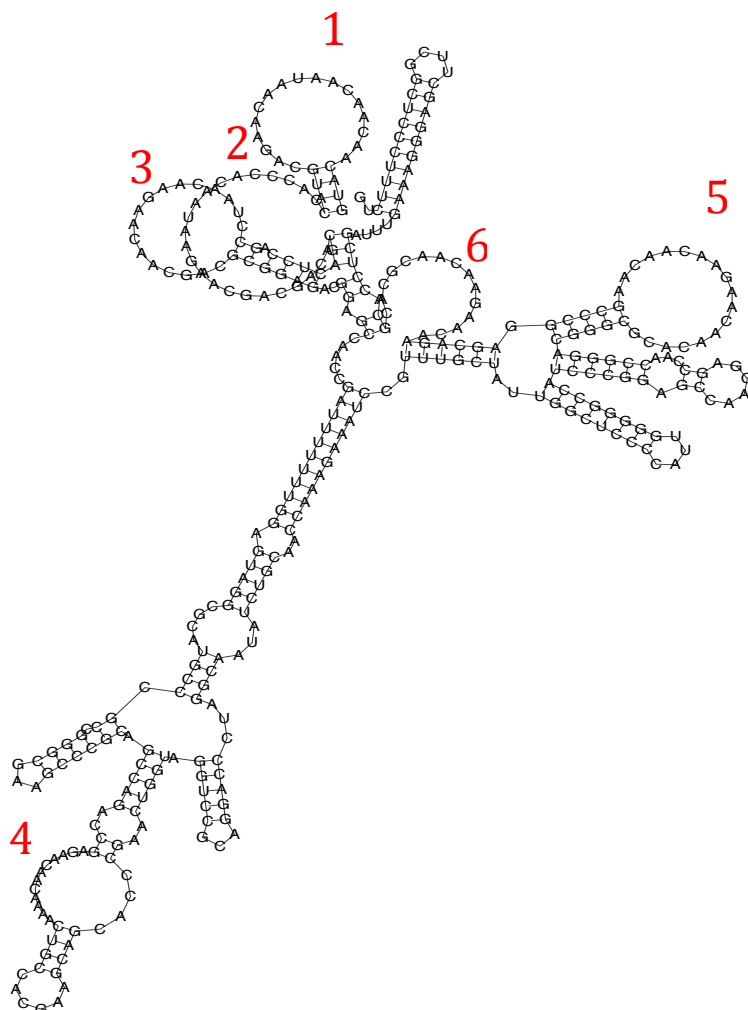

**Figure S1. Predicted secondary structure of the *A. vinelandii* small RNA CrcZ.** It was conducted using the RNAfold algorithm (<http://rna.tbi.univie.ac.at/cgi-bin/RNAfold.cgi>). The predicted A-rich Hfq-binding motifs 1 to 6 are indicated.

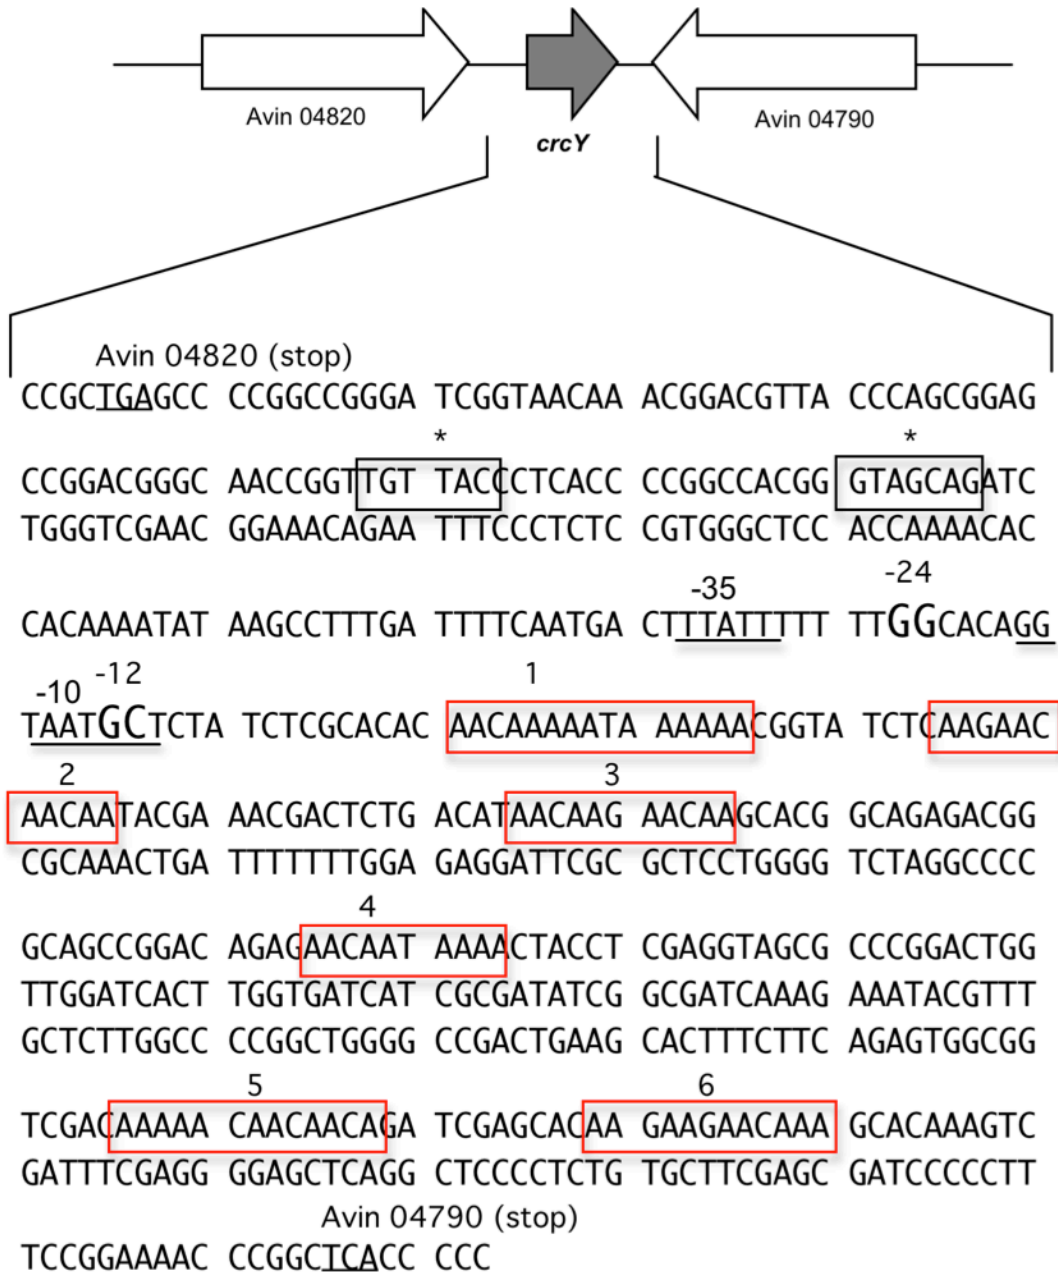

**Figure S2. Genomic context and nucleotide sequence of the *A. vinelandii* *crcY* gene.** The six CrcY A-rich Hfq-binding motifs are indicated by red boxes. The -12 and -24 regions of the RpoN predicted promoter as well as putative sequences recognized by CbrB (asterisks) are indicated. The predicted -10 and -35 regions of an RpoD promoter are underlined.

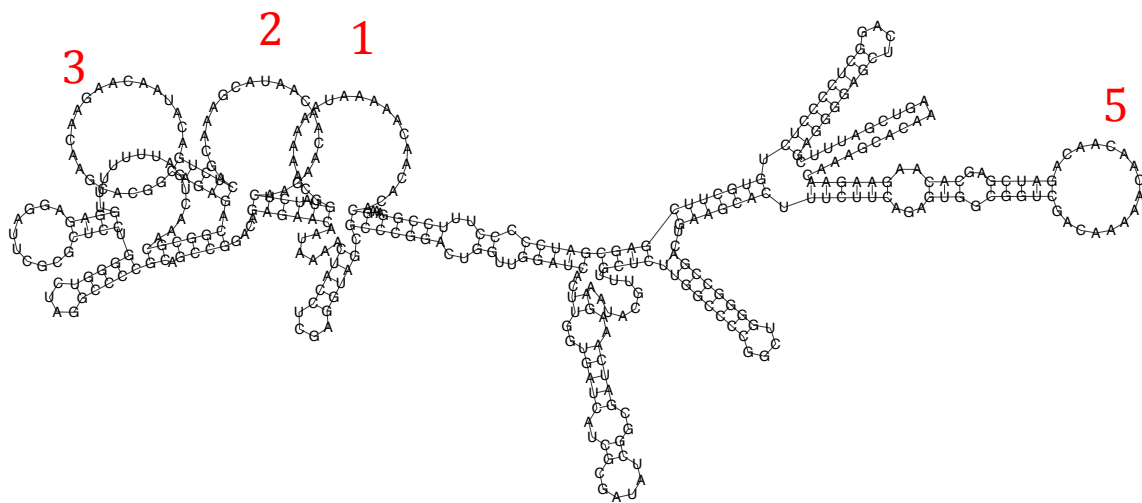

**Figure S3. Predicted secondary structure of the *A. vinelandii* sRNA CrcY.** It was conducted using the RNAfold algorithm (<http://rna.tbi.univie.ac.at/cgi-bin/RNAfold.cgi>). The predicted A-rich Hfq-binding motifs are indicated by red numbers.

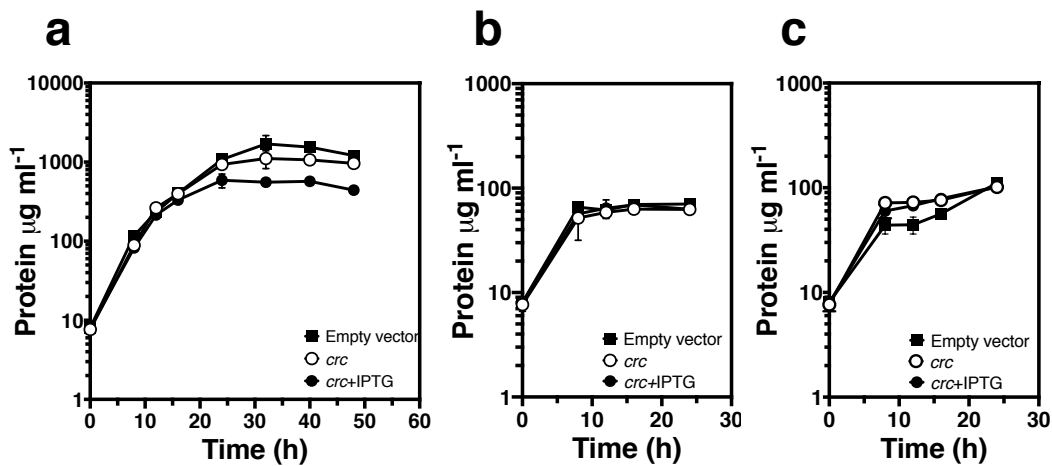

**Figure S4. Effect of Crc over-expression on *A. vinelandii* growth.** Growth kinetics of the wild type *A. vinelandii* AEIV strain, harbouring the empty vector pSRK-Km (■) or the pSRK-*crc* (*crc*<sup>+</sup>) vector, in the presence (●) or absence (○) of 1 mM IPTG. Cultures were developed in Burk's minimal medium supplemented with 30 mM of sucrose (a), acetate (b) or succinate (c) as the sole carbon source and 1.5  $\mu\text{gml}^{-1}$  of kanamycin as a selection marker. 25 ml of Burk's medium supplemented with 30 mM sucrose were cultured for 18 h; cells were harvested by centrifugation, washed with phosphate buffer 10 mM pH 7.2 and resuspended in the same solution. 400  $\mu\text{g}$  of these cells were used to inoculate 50 ml of the culture medium and samples were collected at the indicated times for protein quantification. The results represent the averages of the results of three independent experiments, and error bars depict standard deviations.

|                      |                                                                       |     |
|----------------------|-----------------------------------------------------------------------|-----|
| <i>E. coli</i>       | MAKQSLQDPFLNALRRERVPVSIYLVNGIKLQGQIESFDQFVILLKNTVSQMVKHAI             | 60  |
| <i>P. putida</i>     | MSKGHSLQDPYLNLRKEKVPVSIYLVNGIKLQGSIESFDQFVLLKNTVSQMVKHAI              | 60  |
| <i>A. vinelandii</i> | MSKGHSLQDPYLNLRKERVPVSIYLVNGIKLQGQIESFDQFVILLKNTVSQMVKHAI             | 60  |
|                      | *:*:*:*:*:*:*:*:*:*:*:*:*:*:*:*:*:*:*:*:*:*:*:*:*:*:*:*:*:*:*:*:*:*:* |     |
|                      |                                                                       |     |
| <i>E. coli</i>       | TVVPSRPVSHHSNNAAGGTSSNYHHGSSAQNTSAQQDSEETE                            | 102 |
| <i>P. putida</i>     | TVVPPRPVRLPSPDSEHGDSEP--GNA-----                                      | 86  |
| <i>A. vinelandii</i> | TVVPSRPVRLPTASEGE--QPEP--GNA-----                                     | 84  |
|                      | ****:*:*     : . .     . :     * . :                                  |     |

**Figure S5. Alignment of Hfq proteins from *E. coli*, *P. putida* and *A. vinelandii*.** It was conducted using the Clustal Omega multiple sequence alignment program (<https://www.ebi.ac.uk/Tools/msa/clustalo/>). UniProtKB aligned sequences are *E. coli* P0A6X3; *P. putida*, Q88DD3; *A. vinelandii*, C1DLQ2. Consensus is indicated below each amino acid residue by symbols: asterisk, conserved residue; colon, residues with strongly similar properties; period, residues with weakly similar properties; no symbol, no conservation of properties. Amino acid residue Y25 involved in recognition of the A-rich Hfq-binding motif of *alkS* mRNA in *P. putida*<sup>8</sup> is indicated by a triangle.

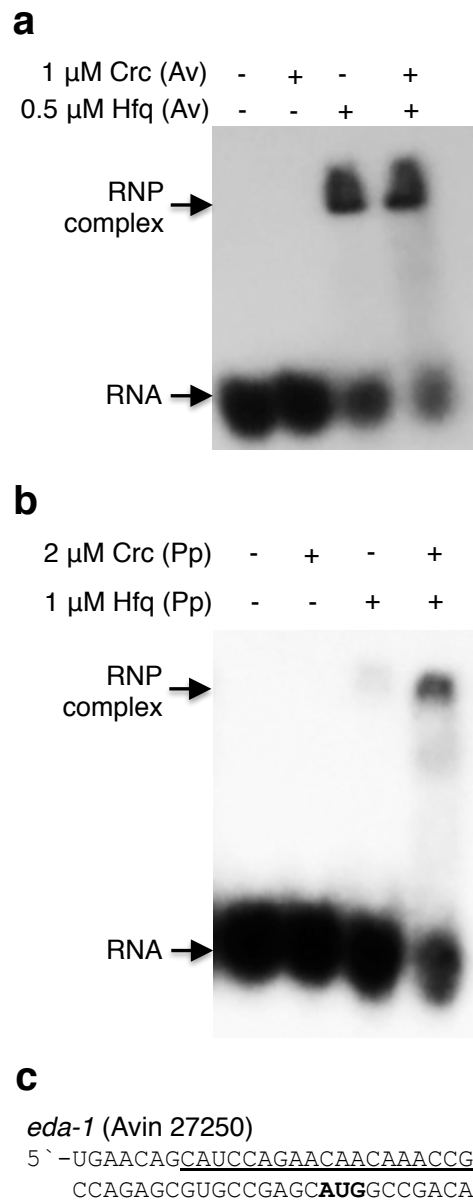

**Figure S6. Hfq-Crc proteins form a complex with the *eda-1* RNA A-rich Hfq-binding motif.** Binding of Hfq and Crc proteins from *A. vinelandii* (Av) (a), or from *P. putida* (pp) (b), to an RNA oligonucleotide containing the A-rich motif present at the translation initiation regions from *eda-1* gene (Avin 27250). RNA and protein-RNA complexes were resolved in a non-denaturing polyacrilamide gel. The concentration of Crc (expressed as monomers) and Hfq (expressed as hexamers) is indicated. Arrows point to the position of free RNA and of the ribonucleoprotein complex (RNP). (c) Sequence corresponding to the *eda-1* mRNA leader region. The underlined sequence corresponds to the RNA oligonucleotide used in the band-shift assays, which contains the A-rich motif. The AUG translation initiation codon is in bold face.



## Supplementary References

- 1 Setubal, J. C. *et al.* Genome sequence of *Azotobacter vinelandii*, an obligate aerobe specialized to support diverse anaerobic metabolic processes. *J Bacteriol* **191**, 4534-4545, doi:10.1128/JB.00504-09 (2009).
- 2 Campos, M. *et al.* Characterization of the gene coding for GDP-mannose dehydrogenase (*algD*) from *Azotobacter vinelandii*. *J Bacteriol* **178**, 1793-1799 (1996).
- 3 Alexeyev, M. F., Shokolenko, I. N. & Croughan, T. P. New mini-Tn5 derivatives for insertion mutagenesis and genetic engineering in gram-negative bacteria. *Can J Microbiol* **41**, 1053-1055 (1995).
- 4 Fellay, R., Frey, J. & Krisch, H. Interposon mutagenesis of soil and water bacteria: a family of DNA fragments designed for in vitro insertional mutagenesis of gram-negative bacteria. *Gene* **52**, 147-154 (1987).
- 5 Johnson, D. C., Unciuleac, M. C. & Dean, D. R. Controlled expression and functional analysis of iron-sulfur cluster biosynthetic components within *Azotobacter vinelandii*. *J Bacteriol* **188**, 7551-7561, doi:10.1128/JB.00596-06 (2006).
- 6 Hernández-Eligio, A. *et al.* RsmA post-transcriptionally controls PhbR expression and polyhydroxybutyrate biosynthesis in *Azotobacter vinelandii*. *Microbiology* **158**, 1953-1963, doi:10.1099/mic.0.059329-0 (2012).
- 7 Muriel-Millan, L. F. *et al.* The unphosphorylated EIIA(Ntr) protein represses the synthesis of alkylresorcinols in *Azotobacter vinelandii*. *PLoS One* **10**, e0117184, doi:10.1371/journal.pone.0117184 (2015).
- 8 Moreno, R. *et al.* The Crc and Hfq proteins of *Pseudomonas putida* cooperate in catabolite repression and formation of ribonucleic acid complexes with specific target motifs. *Environ Microbiol* **17**, 105-118, doi:10.1111/1462-2920.12499 (2015).
- 9 Madhushani, A., Del Peso-Santos, T., Moreno, R., Rojo, F. & Shingler, V. Transcriptional and translational control through the 5'-leader region of the *dmpR* master regulatory gene of phenol metabolism. *Environ Microbiol* **17**, 119-133, doi:10.1111/1462-2920.12511 (2015).
- 10 Barry, T. *et al.* Rapid mini-preparations of total RNA from bacteria. *Nucleic Acids Res* **20**, 4940 (1992).
- 11 Larsen, B. & Haug, A. Biosynthesis of alginate. 3. Tritium incorporation with polymannuronic acid 5-epimerase from *Azotobacter vinelandii*. *Carbohydr Res* **20**, 225-232 (1971).
- 12 Franklin, F. C., Bagdasarian, M., Bagdasarian, M. M. & Timmis, K. N. Molecular and functional analysis of the TOL plasmid pWWO from *Pseudomonas putida* and cloning of genes for the entire regulated aromatic ring meta cleavage pathway. *Proc Natl Acad Sci U S A* **78**, 7458-7462 (1981).
- 13 Hernández-Arranz, S., Moreno, R. & Rojo, F. The translational repressor Crc controls the *Pseudomonas putida* benzoate and alkane catabolic pathways

- using a multi-tier regulation strategy. *Environ Microbiol* **15**, 227-241, doi:10.1111/j.1462-2920.2012.02863.x (2013).
- 14 Hanahan, D. Studies on transformation of *Escherichia coli* with plasmids. *J Mol Biol* **166**, 557-580 (1983).
- 15 Fuentes, L. G. *et al.* Modification of glucose import capacity in *Escherichia coli*: physiologic consequences and utility for improving DNA vaccine production. *Microb Cell Fact* **12**, 42, doi:10.1186/1475-2859-12-42 (2013).
- 16 de Lorenzo, V., Herrero, M., Jakubzik, U. & Timmis, K. N. Mini-Tn5 transposon derivatives for insertion mutagenesis, promoter probing, and chromosomal insertion of cloned DNA in gram-negative eubacteria. *J Bacteriol* **172**, 6568-6572 (1990).
- 17 Silva-Rocha, R. *et al.* The Standard European Vector Architecture (SEVA): a coherent platform for the analysis and deployment of complex prokaryotic phenotypes. *Nucleic Acids Res* **41**, D666-675, doi:10.1093/nar/gks1119 (2013).
- 18 Datsenko, K. A. & Wanner, B. L. One-step inactivation of chromosomal genes in *Escherichia coli* K-12 using PCR products. *Proc Natl Acad Sci U S A* **97**, 6640-6645, doi:10.1073/pnas.120163297 (2000).
- 19 Khan, S. R., Gaines, J., Roop, R. M., 2nd & Farrand, S. K. Broad-host-range expression vectors with tightly regulated promoters and their use to examine the influence of TraR and TraM expression on Ti plasmid quorum sensing. *Appl Environ Microbiol* **74**, 5053-5062, doi:10.1128/AEM.01098-08 (2008).
